# Supplementary material for: Divergent synthesis of N-heterocycles via controllable cyclization of azido-diynes catalyzed by copper and gold
Source: PubMed Central journal article supplement (PMC5701061; doi:10.1038/s41467-017-01853-1), 2017-11-23
Supplement: 41467_2017_1853_MOESM3_ESM.pdf [file 41467_2017_1853_MOESM3_ESM.pdf]

## Description of Additional Supplementary Files

File Name: Supplementary Data 1

Description: Molecular Geometries and Energies.
